1 Purification of native CCL7 and its functional interaction with selected chemokine receptors

2 Marina V. Goncharuk<sup>1\*</sup>, Debarati Roy<sup>2</sup>, Maxim A. Dubinnyi<sup>1,3</sup>, Kirill D. Nadezhdin<sup>1,3</sup>, Ashish Srivastava<sup>2</sup>,  
3 Mithu Baidya<sup>2</sup>, Hemlata Dwivedi-Agnihotri<sup>2</sup>, Alexander S. Arseniev<sup>1,3</sup>, Arun K. Shukla<sup>2\*</sup>

4 <sup>1</sup>Department of Structural Biology, Shemyakin and Ovchinnikov Institute of Bioorganic Chemistry,  
5 Russian Academy of Sciences, Moscow, Russia; <sup>2</sup>Department of Biological Sciences and Bioengineering,  
6 Indian Institute of Technology, Kanpur 208016, India; <sup>3</sup>Moscow Institute of Physics and Technology  
7 (State University), Dolgoprudny, Russia.

8 \*Corresponding author ([m.s.goncharuk@gmail.com](mailto:m.s.goncharuk@gmail.com); [arshukla@iitk.ac.in](mailto:arshukla@iitk.ac.in))

9

10

11

12

13

14

15

16

17

18

19

20 **Abstract**

21 Chemokine receptors form a major sub-family of G protein-coupled receptors (GPCRs) and they are  
22 involved in a number of cellular and physiological processes related to our immune response and  
23 regulation. A better structural understanding of ligand-binding, activation, signaling and regulation of  
24 chemokine receptors is very important to design potentially therapeutic interventions for human  
25 disorders arising from aberrant chemokine signaling. One of the key limitations in probing the structural  
26 details of chemokine receptors is the availability of large amounts of purified, homogenous and fully  
27 functional chemokine ligands, and the commercially available products, are not affordable for in-depth  
28 structural studies. Moreover, production of uniformly isotope-labeled chemokines, for example, suitable  
29 for NMR-based structural investigation, also remains challenging. Here, we have designed a streamlined  
30 approach to express and purify the human chemokine CCL7 as well as its  $^{15}\text{N}$ -,  $^{15}\text{N}/^{13}\text{C}$ -,  $^2\text{H}/^{15}\text{N}/^{13}\text{C}$ -  
31 isotope-labeled derivatives, at milligram levels using *E. coli* expression system. Purified CCL7 not only  
32 maintains a well-folded three-dimensional structure as analyzed using circular dichroism and  $^1\text{H}/^{15}\text{N}$   
33 NMR but it also induces coupling of heterotrimeric G-proteins and  $\beta$ -arrestins for selected chemokine  
34 receptors in cellular system. Our strategy presented here may be applicable to other chemokines and  
35 therefore, provide a potentially generic and cost-effective approach to produce chemokines in large  
36 amounts for functional and structural studies.

37 **Keywords**

38 GPCR, chemokine, arrestins, biased agonism, G-protein, atypical chemokine receptors, recombinant  
39 protein, isotope labeling, NMR spectroscopy

40

41

## 42 **Introduction**

43 G protein-coupled receptors (GPCRs) are responsible for recognizing a broad range of ligands at the cell  
44 surface and transmitting the signal across the membrane for downstream signaling and functional  
45 response (Bockaert and Pin, 1999). Considering their integral role in numerous pathophysiological  
46 conditions, they are one of the most sought-after drug targets, and nearly one third of the currently  
47 prescribed medicines exert their actions through this class of receptors (Kumari et al., 2015, Sriram and  
48 Insel, 2018). One of the major sub-families of GPCRs recognizes various chemokines in our body and  
49 they are collectively grouped as chemokine receptors (Hughes and Nibbs, 2018, Griffith et al., 2014).  
50 These chemokine receptors are critically important for cellular migration among many other functions,  
51 especially in the immune system (Griffith et al., 2014).

52 Chemokines are small proteins with less than hundred amino acid residues and they typically  
53 have overall conserved structural features (Turner et al., 2014). An interesting feature of chemokine  
54 receptors is their ligand promiscuity where a given chemokine can interact with, and modulate several  
55 related chemokine receptors (Proudfoot, 2002). Investigating the interaction of chemokines with their  
56 receptors in terms of precise ligand-receptor contacts, receptor activation, signaling and regulation is  
57 important to understand how the receptor promiscuity and preferences are encoded. Unlike small  
58 peptide GPCR ligands which can be chemically synthesized, chemokines typically harbor several  
59 disulphide linkages and require proper cellular context for folding and attaining a functional  
60 conformation.

61 Although several chemokines are commercially available, using them for structural studies that  
62 require milligram amounts is not feasible. Moreover, batch-to-batch variation and lack of proper  
63 functional characterization of these products further limit their usage in structural and functional  
64 studies. A number of previous studies have documented the purification of chemokines from inclusion

65 bodies after recombinant expression in *E. coli*, however, their proper refolding and functionality remains  
66 a concern. On the other hand, preparing large amounts of chemokines from baculovirus and mammalian  
67 expression system may also not be cost-effective. Thus, new strategies to express and purify native  
68 chemokines, preferably in soluble form without refolding step, is desirable to propel structure-function  
69 studies of chemokine-chemokine receptor complexes. Moreover, streamlined methods to express and  
70 purify isotope labeled chemokines for NMR-based structural characterization is also desirable.

71 Here, we have designed and optimized a streamlined protocol for expression and purification of  
72 native (i.e. untagged) chemokine CCL7 in soluble form using *E. coli*. Our approach allowed us to also  
73 produce sufficient amounts of isotope-labeled derivatives for structural studies using NMR. We  
74 observed that native CCL7 purified from *E. coli* behaves as a full agonist for chemokine receptor CXCR2  
75 and atypical chemokine receptor ACKR2a (also referred to as decoy D6 receptor; D6R) in G-protein  
76 coupling and  $\beta$ -arrestin recruitment assays. The strategy described here should be applicable to other  
77 chemokines and it should facilitate structural characterization of chemokine-chemokine receptor  
78 complexes in future.

## 79 **Results**

### 80 **Expression construct and purification of his6-tagged CCL7**

81 We first designed an expression construct for his6-tagged CCL7 (referred to as his-CCL7 hereafter) in a  
82 pGEMEX1 derived vector (Goncharuk et al., 2018) (Figure 1A) and optimized expression conditions by  
83 systematic comparison of expression time, temperature and IPTG concentrations. We evaluated the  
84 soluble expression of his-CCL7 using a previously published protocol (Goncharuk et al., 2011) and  
85 identified that its expression is optimal when cultures are grown at 20°C for 48h after induction with  
86 1mM IPTG in TB (Terrific Broth) medium. For growth in minimal salt medium, cells were grown at 27°C  
87 for 48h after induction with 0.5mM IPTG induction to obtain maximal his-CCL7 expression. We followed

88 these conditions for expression scale-up and purified his-CCL7 using a two-step purification scheme  
89 involving Ni-NTA agarose and cation-exchange chromatography. We obtained highly pure his-CCL7 with  
90 an overall yield of about 25-30mg per liter culture (Figure 1B). In order to evaluate the conformational  
91 homogeneity of purified his-CCL7, we analyzed the purified sample on Superdex 200 Increase (10/300  
92 GL) based size exclusion chromatography which revealed a monodisperse elution profile (Figure 1C). The  
93 purity and identity of his-CCL7 was further confirmed by LC-MS which displays a predominant peak at  
94 m/z of 10,050.4 Da and confirms the formation of two disulphide bonds (Figure 1D).

#### 95 **NMR analysis of <sup>15</sup>N labeled his6-tagged CCL7**

96 In order to test whether CCL7 purified using this protocol is properly folded, we confirmed its secondary  
97 structure using CD spectroscopy and NMR spectroscopy (Figure 2A-B). The observed secondary structure  
98 in CD spectroscopy agrees well with the expected range for his-CCL7 (Figure 2A). For NMR spectroscopy,  
99 we expressed and purified stable isotope labeled his-CCL7 by growing the cells in M9 minimal media  
100 containing the corresponding source of stable isotopes. Subsequently, we used unlabeled (0.3mM) and  
101 <sup>15</sup>N-labeled (0.8 mM) his-CCL7 samples in H<sub>2</sub>O/D<sub>2</sub>O at pH 5.1 to acquire NMR data at 700MHz  
102 spectrometer for structural verification and sequential NMR assignment (Figure 2). We used non-  
103 uniform sampling technique (Kazimierczuk and Orekhov, 2015) to increase the resolution of 3-D <sup>15</sup>N-  
104 TOCSY-HSQC (20% fill of full time domain matrix) and 3-D <sup>15</sup>N-NOESY-HSQC experiment (38% fill of  
105 matrix) resulting in reduction of experimental time to 24h and 58h, respectively. For assignment, we  
106 adopted a previously reported entry for CCL7 (BMRB entry 4177) (Kim et al., 1996) as it does not have  
107 any significant difference with our construct except the Gly-Ser sequence between his6 and CCL7 . We  
108 observed that all the NMR NOESY contacts support well-known spatial structure of CCL7 published  
109 previously in PDB, for example, by NMR (1B00 and 1NCV, monomer and dimer, respectively) (Kim et al.,  
110 1996, Meunier et al., 1997) and by X-ray crystallography (4ZKC)(Counago et al., 2015). For example, the

111  $\alpha$ -helix K58-L67, and  $\beta$ -sheets L25-R30 and V41-T45, are clearly identified by their characteristic NOE  
112 contacts (data not shown). Interestingly, we did not observe any of the eight inter-monomer NOE  
113 contacts reported previously for CCL7 (Meunier et al., 1997) suggesting that his-CCL7 purified here is  
114 primarily in a monomeric state. It is also plausible that our  $^{15}\text{N}$ -resolved 3D experiments at high  
115 resolution provide a more accurate analysis of ambiguous NOE restraints compared to earlier work using  
116 2D NMR of unlabeled CCL7 (Meunier et al., 1997).

### 117 **Functional characterization of his-CCL7 in G-protein coupling assay**

118 In order to probe the functionality of purified his-CCL7, we measured its ability to induce G $\alpha$ i-coupling  
119 upon stimulation of chemokine receptor CCR2 using GloSensor assay (Kumar et al., 2017). We used  
120 carboxyl-terminal Fc-tagged CCL7 (CCL7-Fc) purified from Sf9 cells as a reference. Although his-CCL7  
121 behaved as a full-agonist at CCR2 with respect to G $\alpha$ i-coupling with almost an equivalent  $B_{\text{max}}$  as CCL7-Fc,  
122 its potency was approximately 100 fold less than that of CCL7-Fc ( $\text{IC}_{50}$  of  $\sim 10\text{nM}$ )(Figure 3A-B). These  
123 observations suggest that the his6-tag present at the N-terminus of CCL7 potentially interferes with its  
124 ability to induce effective G-protein-coupling at CCR2. Thus, we designed an alternative strategy to  
125 generate a native CCL7 without any N-terminal or C-terminal tag.

### 126 **Expression construct and purification of native CCL7**

127 In order to generate a fully native CCL7 without any modification at the N- or the C-terminal, we  
128 designed an expression construct with N-terminal his6-tag followed by an enterokinase cleavage site  
129 referred to as his-EK-CCL7 (Figure 4A). As enterokinase effectively cleaves the fusion protein after lysine  
130 (or arginine), incorporation of its recognition sequence (Asp-Asp-Asp-Asp-Arg) before CCL7, allows the  
131 generation of native N-terminus in CCL7. In order to enhance the availability of the enterokinase  
132 cleavage site, a flexible linker (GSGSG) was engineered after the his6-tag. Similar to his6-tagged CCL7,  
133 we optimized the expression conditions for his-EK-CCL7 and purified it first using Ni-NTA

134 chromatography (Figure 4B). Afterwards, we cleaved the fusion protein with the enterokinase which  
135 yielded approximately 70% cleavage of the fusion protein. Subsequent cation exchange chromatography  
136 using Resource S column efficiently separated the cleaved CCL7 and uncleaved fusion protein (Figure  
137 4B). In order to evaluate the conformational homogeneity of purified native CCL7, we analyzed the  
138 purified sample on Superdex 200 Increase (10/300 GL) based size exclusion chromatography which  
139 revealed a monodisperse elution profile (Figure 4C).

#### 140 **Functional characterization of native CCL7 in G-protein coupling and $\beta$ -arrestin recruitment assays**

141 We measured the functionality of purified native CCL7 using two different assays. First, we carried out  
142 GloSensor assay as described above to evaluate the ability of native CCL7 to induce G $\alpha$ i-coupling for  
143 CCR2. Unlike his-CCL7, the native CCL7 was as potent and efficient as CCL7-Fc with an IC<sub>50</sub> of about  
144 0.3nM (Figure 5A-B). These observations suggest that the his6-tag present at the N-terminus of CCL7  
145 potentially interferes with its ability to induce effective G-protein-coupling at CCR2. Second, we carried  
146 out confocal microscopy based assay to assess whether native CCL7 can effectively drive  $\beta$ arr  
147 recruitment for two different 7TMRs namely the ACKR2 and CCR2. As presented in Figure 6A-D, we  
148 observed efficient membrane translocation of  $\beta$ arr2 at early time-points (2-5 min) and subsequent  
149 translocation to endosomes upon extended ligand stimulation (5-30 min), for both CCR2 and ACKR2.  
150 These data demonstrate that native CCL7 purified from *E. coli* is functional in terms of inducing efficient  
151 receptor-transducer coupling, and therefore, suitable for structure-function studies in future.

#### 152 **Discussion**

153 Investigating the interaction of chemokines with chemokine receptors is an important subject area in  
154 order to understand their activation, signaling and regulatory mechanisms. However, technical  
155 challenges associated with preparing large amounts of chemokines in native and fully functional form  
156 has limited our ability to study structural aspects of ligand-receptor complexes for the members of

157 chemokine receptor sub-family. Although some functional studies have used chemokines in *E. coli*, they  
158 have primarily used constructs that do not yield native N- and C-terminus resulting in sub-optimal  
159 affinity and efficacy, and making them less relevant for structural characterization. Furthermore, in most  
160 cases, chemokines expressed in *E. coli* were present in inclusion bodies and had to be refolded for  
161 subsequent studies; however, our protocol yielded soluble expression of CCL7 that can be purified in  
162 milligram amounts without the need for any refolding procedure.

163 Our strategy based on the incorporation of enterokinase cleavage site at the N-terminus of CCL7  
164 in the fusion protein allows us to preserve native sequence without any residual modification arising  
165 from affinity tags or cleavage sites. This results in expected potency profile of CCL7 in G $\alpha$ i-coupling for  
166 CCR2 and in promoting typical trafficking pattern of  $\beta$ arrs for ACKR2 and CCR2. Comparison of cAMP  
167 response induced by his-CCL7 and native-CCL7 also indicates that modification of the N-terminus of  
168 CCL7 compromises its functionality with respect to transducer coupling, an observation that may be  
169 relevant to other chemokines as well. It is plausible that a similar strategy can be adapted for generating  
170 the milligram amounts of native version of other chemokines as well as their isotope-labeled derivatives,  
171 and it should facilitate structure-function studies of chemokine receptors.

172 An obvious caveat of expression of chemokines in *E. coli* is the lack of post-translational  
173 modifications (PTMs) such as glycosylation. Although there is evidence of O-glycosylation for one of the  
174 chemokines, CCL2, when isolated from native tissues, it appears to have no significant effect on activity  
175 (Jiang et al., 1991, Jiang et al., 1990, Proost et al., 2006). Most of the chemokines appear to be  
176 functional even in the absence of any PTM, however, this is an aspect that should be investigated  
177 further with respect to receptor binding and transducer coupling. Our experiments suggest that native  
178 CCL7 purified from *E. coli* is fully functional with respect to G $\alpha$ i-coupling for CCR2 and  $\beta$ arr recruitment  
179 for CCR2 and ACKR2. Nonetheless, future studies evaluating signaling outputs and cellular responses



180 may be important to further establish the complete functional profile of CCL7.

181 In conclusion, we present a streamlined strategy for preparing milligram amounts of fully  
182 functional CCL7 with native N- and C-terminus, which can potentially be adapted for other chemokines.  
183 Our study paves the way for structural and functional characterization of CCL7-bound CCR2 and ACKR2,  
184 and potentially other chemokine receptors.

## 185 **Acknowledgments**

186 The work described in this paper is primarily supported by an Indo-Russian project [INT/RUS/RFBR/P-  
187 253] from the Department of Science and Technology [DST] awarded to AKS in India and Russian  
188 Foundation for Basic Research (RFBR) grant 17-54-45064 in Russia awarded to ASA. In addition, the  
189 research program in Dr. Shukla's laboratory is supported by an Intermediate Fellowship of the Wellcome  
190 Trust/DBT India Alliance Fellowship [grant number IA/I/14/1/501285] awarded to AKS, the Science and  
191 Engineering Research Board (SERB) (EMR/2017/003804), Innovative Young Biotechnologist Award from  
192 the Department of Biotechnology (DBT) (BT/08/IYBA/2014-3) and the Indian Institute of Technology,  
193 Kanpur. Dr. Shukla is an Intermediate Fellow of Wellcome Trust/DBT India Alliance, EMBO Young  
194 Investigator and Joy Gill Chair Professor. Drs. Hemlata Dwivedi and Mithu Baidya were supported by  
195 National Post-Doctoral Fellowship of SERB (PDF/2016/002930 and PDF/2016/2893). Dr. Ashish  
196 Srivastava is supported by the Wellcome Trust/DBT India Alliance Early Career Fellowship [grant number  
197 IA/E/17/1/503687]. The sequential NMR assignment of <sup>15</sup>N-labeled his-CCL7 and secondary structure  
198 verification in Prof. Arseniev's laboratory are supported by Russian Science Foundation (RSF) grant 19-  
199 74-30014 awarded to ASA. We thank Dr. Eshan Ghosh and Ravi Ranjan for their contribution in  
200 purification of CCL7-Fc from Sf9 cells, Igor A. Ivanov for mass spectrum of his-CCL7.

## 201 **Author contributions**

202 MVG designed and executed the purification of his-CCL7 and native CCL7, produced isotope-labeled  
203 variant of his-CCL7 for NMR experiments; MAD and KDN performed NMR experiments and analyzed  
204 NMR data; DR carried out expression and purification of CCL7 in the Shukla laboratory with assistance  
205 from AS, and participated in GloSensor and confocal microscopy experiments executed by HD and MB,  
206 respectively. All authors contributed in writing and editing the manuscript. AKS and ASA managed the  
207 overall project.

## 208 **Conflict of interest**

209 Authors declare no competing interest.

## 210 **Materials and methods**

### 211 General reagents, strains and cell lines

212 XL-1 and BL21(DE3)pLysS strains of *E.coli* were purchased from Stratagene (USA) and a previously  
213 described vector pGEMEX-1(his6) was used for generating expression constructs (Goncharuk et al.,  
214 2018). Synthetic oligonucleotides were produced and DNA sequencing was performed by Evrogen  
215 (Russia). Isotope labels ( $^2\text{H}$ ,  $^{15}\text{N}$ ,  $^{13}\text{C}$ ) were incorporated using CIL reactives (United States).

### 216 Construction of the expression plasmids.

217 The human CCL7 gene was PCR amplified without the intrinsic signal sequence along with partial codon  
218 optimization for expression in *E. coli* from the pFastBac-CCL7\_Fc vector (designed and generated in  
219 Shukla lab) using specific primers. For his-EK-CCL7, a sequence encoding DDDDR amino acids (i.e.  
220 enterokinase cleavage site) was introduced at the 5' end of the CCL7 gene. The PCR products were  
221 cloned into home-made pGEMEX-1(his6) vector (Goncharuk et al., 2018) using NdeI and HindIII  
222 restriction sites. Expression plasmids were verified by DNA sequencing.

223 Expression of CCL7 in *E. coli*

224 Expression plasmids encoding his-CCL7 and his-EK-CCL7 were transformed in chemically competent  
225 BL21(DE3)pLysS cells and plated onto LB or YT agar plates supplemented with 100µg/ml ampicillin and  
226 25 mkg/ml chloramphenicol. After overnight incubation at 37°C, 50 medium-size single colonies were  
227 flushed with 1ml TB media to inoculate 1L TB media along with 200µg/ml ampicillin and 25 mkg/ml  
228 chloramphenicol. Bacterial cells were cultured at 27°C, 250 rpm overnight until next day when the  
229 OD<sub>600</sub> reached 1.5. At this point, culture was induced with 1mM IPTG, and the cultures were grown at  
230 20°C for additional 48h. Subsequently, cells were harvested using centrifugation and pellets were store  
231 at -80°C.

232 In order to prepare isotope labeled CCL7, transformed cells were cultured using M9 minimal salt  
233 medium, containing 0.0002% yeast extract and (0.2% <sup>15</sup>NH<sub>4</sub>Cl), (0.2% <sup>15</sup>NH<sub>4</sub>Cl, 0.4% [U-<sup>13</sup>C]-glucose), or  
234 (D<sub>2</sub>O, 0.2% <sup>15</sup>NH<sub>4</sub>Cl, 0.4% [U-<sup>13</sup>C]-glucose), correspondingly. Cell were induced at an OD600 of 0.6 with  
235 0.5mM IPTG followed by subsequent growth at 27°C for additional 48h.

236 Purification of his-CCL7 and native CCL7

237 Cell pellets corresponding to 1L culture were re-suspended in 50ml lysis buffer containing 30mM MOPS,  
238 pH 7.2, 1M NaCl, 10mM imidazole, 5%(v/v) glycerol, 0.3%(v/v) TritonX-100, 1mM PMSF. Cells were lysed  
239 by sonication on ice for 15 min with amplitude of 45 % (pulse of 15sec ON and 30sec OFF) or until  
240 complete lysis took place and cell lysate was then centrifuged at 14000g for 1h at 4°C followed by  
241 filtration through 0.22µm filter to remove cellular debris and unbroken cells. Clear supernatant was  
242 loaded onto a Ni-NTA affinity column containing 4ml Ni-NTA resin (Clontech) pre-equilibrated with lysis  
243 buffer at an approximate flow rate of 1ml/min. Flow through fraction containing unbound proteins was  
244 collected and the column was washed with 25 bed volumes of wash buffer containing 30mM MOPS, pH  
245 7.2, 1M NaCl, 10mM imidazole, and 5%(v/v)glycerol. Bound proteins were then eluted with 6-7 bed

246 volumes of elution buffer (30mM MOPS, pH 7.2, 1M NaCl, 500mM imidazole, and 5% glycerol). The  
247 elution fractions were analyzed on SDS-PAGE and fractions containing maximum amount of CCL7 were  
248 pooled and used for subsequent second purification step.

249 For his-CCL7, Ni-NTA eluate was desalted by about ten-fold dilution with 30 mM MES buffer, pH  
250 5.8 or by dialysis against the 30 mM MES, 30 mM NaCl buffer, pH 5.8, clarified by centrifugation at  
251 24000g for 20min at 4°C, filtered through a 0.22 µm filter and loaded onto to a cation-exchange column  
252 (5mL, SP FF, GE Healthcare), pre-equilibrated with 30 mM MES, pH 5.8, 30mM NaCl. Afterwards, the  
253 column was washed until the UV (280nm) reading reached baseline, and subsequently, bound proteins  
254 were eluted with a 30-1000 mM linear NaCl gradient in ten column volumes. Peak fractions were  
255 analyzed by SDS-PAGE, pooled and concentrated/desalted using 3kDa Amicon spin-concentrators, flash  
256 frozen and stored at -80°C in small aliquots for subsequent experiments. For NMR experiments, isotope-  
257 labeled CCL7 were buffer exchanged to 5mM Potassium Phosphate buffer, pH 5.1 containing, 0.0025%  
258 NaN<sub>3</sub>.

259 For the purification of native CCL7, Ni-NTA elution of his-EK-CCL7 was dialyzed overnight at 4°C  
260 against enterokinase digestion buffer (20mM Tris, pH 8.0, 50mM NaCl, 2mM CaCl<sub>2</sub>). Precipitated  
261 proteins were removed by centrifugation at 14000g for 30 min at 4°C and the remaining soluble protein  
262 was incubated with enterokinase light chain (NEB) for 16h at room-temperature as per manufacturer's  
263 protocol. The cleavage efficiency of enterokinase under these conditions was typically 70-80%.  
264 Afterwards, native CCL7 was isolated using two different and independent protocols. In the first  
265 method, enterokinase cleaved sample was loaded on to Resource S cation exchange column followed by  
266 elution using a linear gradient of NaCl (50-1000mM) over 10 column volumes. In the second method,  
267 enterokinase cleaved sample was loaded onto 1mL Ni-NTA resin and flow through fractions containing  
268 native CCL7 were collected. In both methods, fractions containing native CCL7 were pooled and stored

269 as described above. Expression and purification of CCL7-Fc construct using baculovirus infected Sf9 cells  
270 will be described separately (Manuscript in preparation).

#### 271 Size-exclusion chromatography

272 Purified his-CCL7 and native CCL7 were loaded on pre-equilibrated (20mM Hepes, 100mM NaCl, pH 7.5)  
273 Superdex 200 Increase (10/300 GL) column (GE) in a volume of 100 $\mu$ l at 1-10mg/ml concentration.  
274 Subsequently, the column was run at 0.4 ml/min flow rate, the elution profile of CCL7 was monitored at  
275 280nm and fractions were analyzed on SimplyBlue stained SDS-PAGE.

#### 276 NMR spectroscopy

277 NMR spectra of “cold” and <sup>15</sup>N-labeled his-CCL7 were acquired on Bruker Avance 700MHz NMR  
278 spectrometer equipped with 5 mm PATXI probe. The following NMR spectra were acquired in H<sub>2</sub>O/D<sub>2</sub>O  
279 (9:1), pH 5.1 (pH-meter readings), temperature 30°C: 2D NOESY ( $\tau_m$ =100ms) and 2D TOCSY ( $\tau_m$ =60ms)  
280 for “cold” his-CCL7 sample; 2D <sup>1</sup>H-<sup>15</sup>N HSQC, 3D <sup>1</sup>H-<sup>15</sup>N NOESY-HSQC ( $\tau_m$ =100ms) and 3D <sup>1</sup>H-<sup>15</sup>N TOCSY-  
281 HSQC were acquired for <sup>15</sup>N-labeled his-CCL7, 3D spectra were acquired and processed in Non-  
282 Uniformly Sampled mode (Kazimierczuk and Orekhov, 2015).

#### 283 GloSensor assay

284 The ability of purified CCL7 to trigger G-protein coupling was assessed with respect to inhibition of  
285 forskolin-induced cAMP response using GloSensor assay as described previously (Pandey et al., 2019,  
286 Kumari et al., 2017, Kumar et al., 2017). Briefly, HEK cells at a density of 3 million were transfected with  
287 3.5 $\mu$ g each of CCR2 and the luciferase-based cAMP biosensor (pGloSensor<sup>TM</sup>-22F plasmid; Promega)  
288 plasmids. After 16-18 hour of transfection, cells were trypsinised, centrifuged and resuspended in buffer  
289 (1XHBSS and 20mM HEPES, pH 7.4) containing 0.5mg/ml luciferin (LUCNA-1G/GOLDBIO). The cells were  
290 then seeded in a 96 well plate at a density of 6 X 10<sup>4</sup> cells /100 $\mu$ l/ well. The plate was kept at 37°C for

291 90min in the CO<sub>2</sub> incubator followed by incubation at room temperature for 30 minutes. Basal reading  
292 was read on luminescence mode of multi-plate reader (Victor X4). Since CCR2 is a Gai-coupled receptor,  
293 a receptor-independent adenylyl cyclase stimulator, Forskolin (10μM) was added to each well and  
294 luminescence was recorded until reading were stable (10 cycle repeats). Thereafter, cells were  
295 stimulated with varying doses of each ligand ranging from 0.01pM to 1μM and luminescence was  
296 recorded for 60min using a microplate reader. Data was normalized with maximal response obtained  
297 with highest ligand concentration after basal correction and analyzed using nonlinear regression in  
298 GraphPad Prism software. Data presented in Figure 3 and 5 were measured simultaneously with shared  
299 CCL7-Fc condition.

### 300 Confocal microscopy

301 In order to test the functionality of CCL7 in terms of βarr recruitment and trafficking, we used confocal  
302 microscopy based analysis of βarr2 recruitment and trafficking as described previously (Ghosh et al.,  
303 2017, Pandey et al., 2019). Briefly, HEK-293 cells were transfected using either ACKR2 or CCR2 (3.5 μg  
304 each per 10cm plate) along with either βarr2-YFP or βarr2-mCherry (3.5 μg). 24h post-transfection, cells  
305 were seeded at one million density on a 35x10 mm confocal dish (GenetiX). To study agonist dependent  
306 βarr2 recruitment in transfected cells, live cell imaging was carried out 48 h post-transfection using the  
307 Zeiss LSM 710 NLO confocal microscope with oil-immersion 63X /1.40 NA, objective, equipped with CO<sub>2</sub>  
308 and temperature controlled platform and having 32x array GaAsP descanned detector (Zeiss). A  
309 multiline argon laser at 488 nm and a Diode Pump Solid State Laser at 561 nm was used for imaging YFP-  
310 tagged βarr2 or mCherry-tagged βarr2 respectively. CCL7 (1μM) was added to the cells and incubated  
311 for ~2 mins and the cells were then imaged for up to 40 min.

### 312 Quantification and statistical analysis

313 Expression and purification experiments were repeated multiple times, and functional assays were

314 repeated at least three times. Corresponding details of data normalization and quantification are  
315 included in the respective figure legends.

## 316 References

- 317 Couñago, R.M., Knapp, K.M., Nakatani, Y., Fleming, S.B., Corbett, M., Wise, L.M., Mercer, A.A., and  
318 Krause, K.L. (2015). Structures of Orf Virus Chemokine Binding Protein in Complex with Host  
319 Chemokines Reveal Clues to Broad Binding Specificity. *Structure* 23, 1199–1213.
- 320 BOCKAERT, J. & PIN, J. P. 1999. Molecular tinkering of G protein-coupled receptors: an evolutionary  
321 success. *EMBO J*, 18, 1723-9.
- 322 COUNAGO, R. M., KNAPP, K. M., NAKATANI, Y., FLEMING, S. B., CORBETT, M., WISE, L. M., MERCER, A. A.  
323 & KRAUSE, K. L. 2015. Structures of Orf Virus Chemokine Binding Protein in Complex with Host  
324 Chemokines Reveal Clues to Broad Binding Specificity. *Structure*, 23, 1199-213.
- 325 GHOSH, E., SRIVASTAVA, A., BAIDYA, M., KUMARI, P., DWIVEDI, H., NIDHI, K., RANJAN, R., DOGRA, S.,  
326 KOIDE, A., YADAV, P. N., SIDHU, S. S., KOIDE, S. & SHUKLA, A. K. 2017. A synthetic intrabody-  
327 based selective and generic inhibitor of GPCR endocytosis. *Nat Nanotechnol*, 12, 1190-1198.
- 328 GONCHARUK, M. V., SHUL'GA, A. A., ERMOLIUK IA, S., TKACH, E. N., GONCHARUK, S. A., PUSTOVALOVA  
329 IU, E., MINEEV, K. S., BOCHAROV, E. V., MASLENNIKOV, I. V., ARSEN'EV, A. S. & KIRPICHNIKOV,  
330 M. P. 2011. [Bacterial synthesis, purification, and solubilization of transmembrane segments of  
331 ErbB family members]. *Mol Biol (Mosk)*, 45, 892-902.
- 332 GONCHARUK, S. A., ARTEMIEVA, L. E., TABAKMAKHER, V. M., ARSENIEV, A. S. & MINEEV, K. S. 2018.  
333 CARD domain of rat RIP2 kinase: Refolding, solution structure, pH-dependent behavior and  
334 protein-protein interactions. *PLoS One*, 13, e0206244.
- 335 GRIFFITH, J. W., SOKOL, C. L. & LUSTER, A. D. 2014. Chemokines and chemokine receptors: positioning  
336 cells for host defense and immunity. *Annu Rev Immunol*, 32, 659-702.
- 337 HUGHES, C. E. & NIBBS, R. J. B. 2018. A guide to chemokines and their receptors. *FEBS J*, 285, 2944-2971.
- 338 JIANG, Y., TABAK, L. A., VALENTE, A. J. & GRAVES, D. T. 1991. Initial characterization of the carbohydrate  
339 structure of MCP-1. *Biochem Biophys Res Commun*, 178, 1400-4.
- 340 JIANG, Y., VALENTE, A. J., WILLIAMSON, M. J., ZHANG, L. & GRAVES, D. T. 1990. Post-translational  
341 modification of a monocyte-specific chemoattractant synthesized by glioma, osteosarcoma, and  
342 vascular smooth muscle cells. *J Biol Chem*, 265, 18318-21.
- 343 KAZIMIERCZUK, K. & OREKHOV, V. 2015. Non-uniform sampling: post-Fourier era of NMR data collection  
344 and processing. *Magn Reson Chem*, 53, 921-6.
- 345 KIM, K. S., RAJARATHNAM, K., CLARK-LEWIS, I. & SYKES, B. D. 1996. Structural characterization of a  
346 monomeric chemokine: monocyte chemoattractant protein-3. *FEBS Lett*, 395, 277-82.
- 347 KUMAR, B. A., KUMARI, P., SONA, C. & YADAV, P. N. 2017. GloSensor assay for discovery of GPCR-  
348 selective ligands. *Methods Cell Biol*, 142, 27-50.
- 349 KUMARI, P., GHOSH, E. & SHUKLA, A. K. 2015. Emerging Approaches to GPCR Ligand Screening for Drug  
350 Discovery. *Trends Mol Med*, 21, 687-701.
- 351 KUMARI, P., SRIVASTAVA, A., GHOSH, E., RANJAN, R., DOGRA, S., YADAV, P. N. & SHUKLA, A. K. 2017.  
352 Core engagement with beta-arrestin is dispensable for agonist-induced vasopressin receptor  
353 endocytosis and ERK activation. *Mol Biol Cell*, 28, 1003-1010.
- 354 MEUNIER, S., BERNASSAU, J. M., GUILLEMOT, J. C., FERRARA, P. & DARBON, H. 1997. Determination of  
355 the three-dimensional structure of CC chemokine monocyte chemoattractant protein 3 by 1H  
356 two-dimensional NMR spectroscopy. *Biochemistry*, 36, 4412-22.

- 357 PANDEY, S., LI, X. X., SRIVASTAVA, A., BAIDYA, M., KUMARI, P., DWIVEDI, H., CHATURVEDI, M., GHOSH,  
358 E., WOODRUFF, T. M. & SHUKLA, A. K. 2019. Partial ligand-receptor engagement yields  
359 functional bias at the human complement receptor, C5aR1. *J Biol Chem*, 294, 9416-9429.
- 360 PROOST, P., STRUYF, S. & VAN DAMME, J. 2006. Natural post-translational modifications of chemokines.  
361 *Biochem Soc Trans*, 34, 997-1001.
- 362 PROUDFOOT, A. E. 2002. Chemokine receptors: multifaceted therapeutic targets. *Nat Rev Immunol*, 2,  
363 106-15.
- 364 SRIRAM, K. & INSEL, P. A. 2018. G Protein-Coupled Receptors as Targets for Approved Drugs: How Many  
365 Targets and How Many Drugs? *Mol Pharmacol*, 93, 251-258.
- 366 TURNER, M. D., NEDJAI, B., HURST, T. & PENNINGTON, D. J. 2014. Cytokines and chemokines: At the  
367 crossroads of cell signalling and inflammatory disease. *Biochim Biophys Acta*, 1843, 2563-2582.
- 368



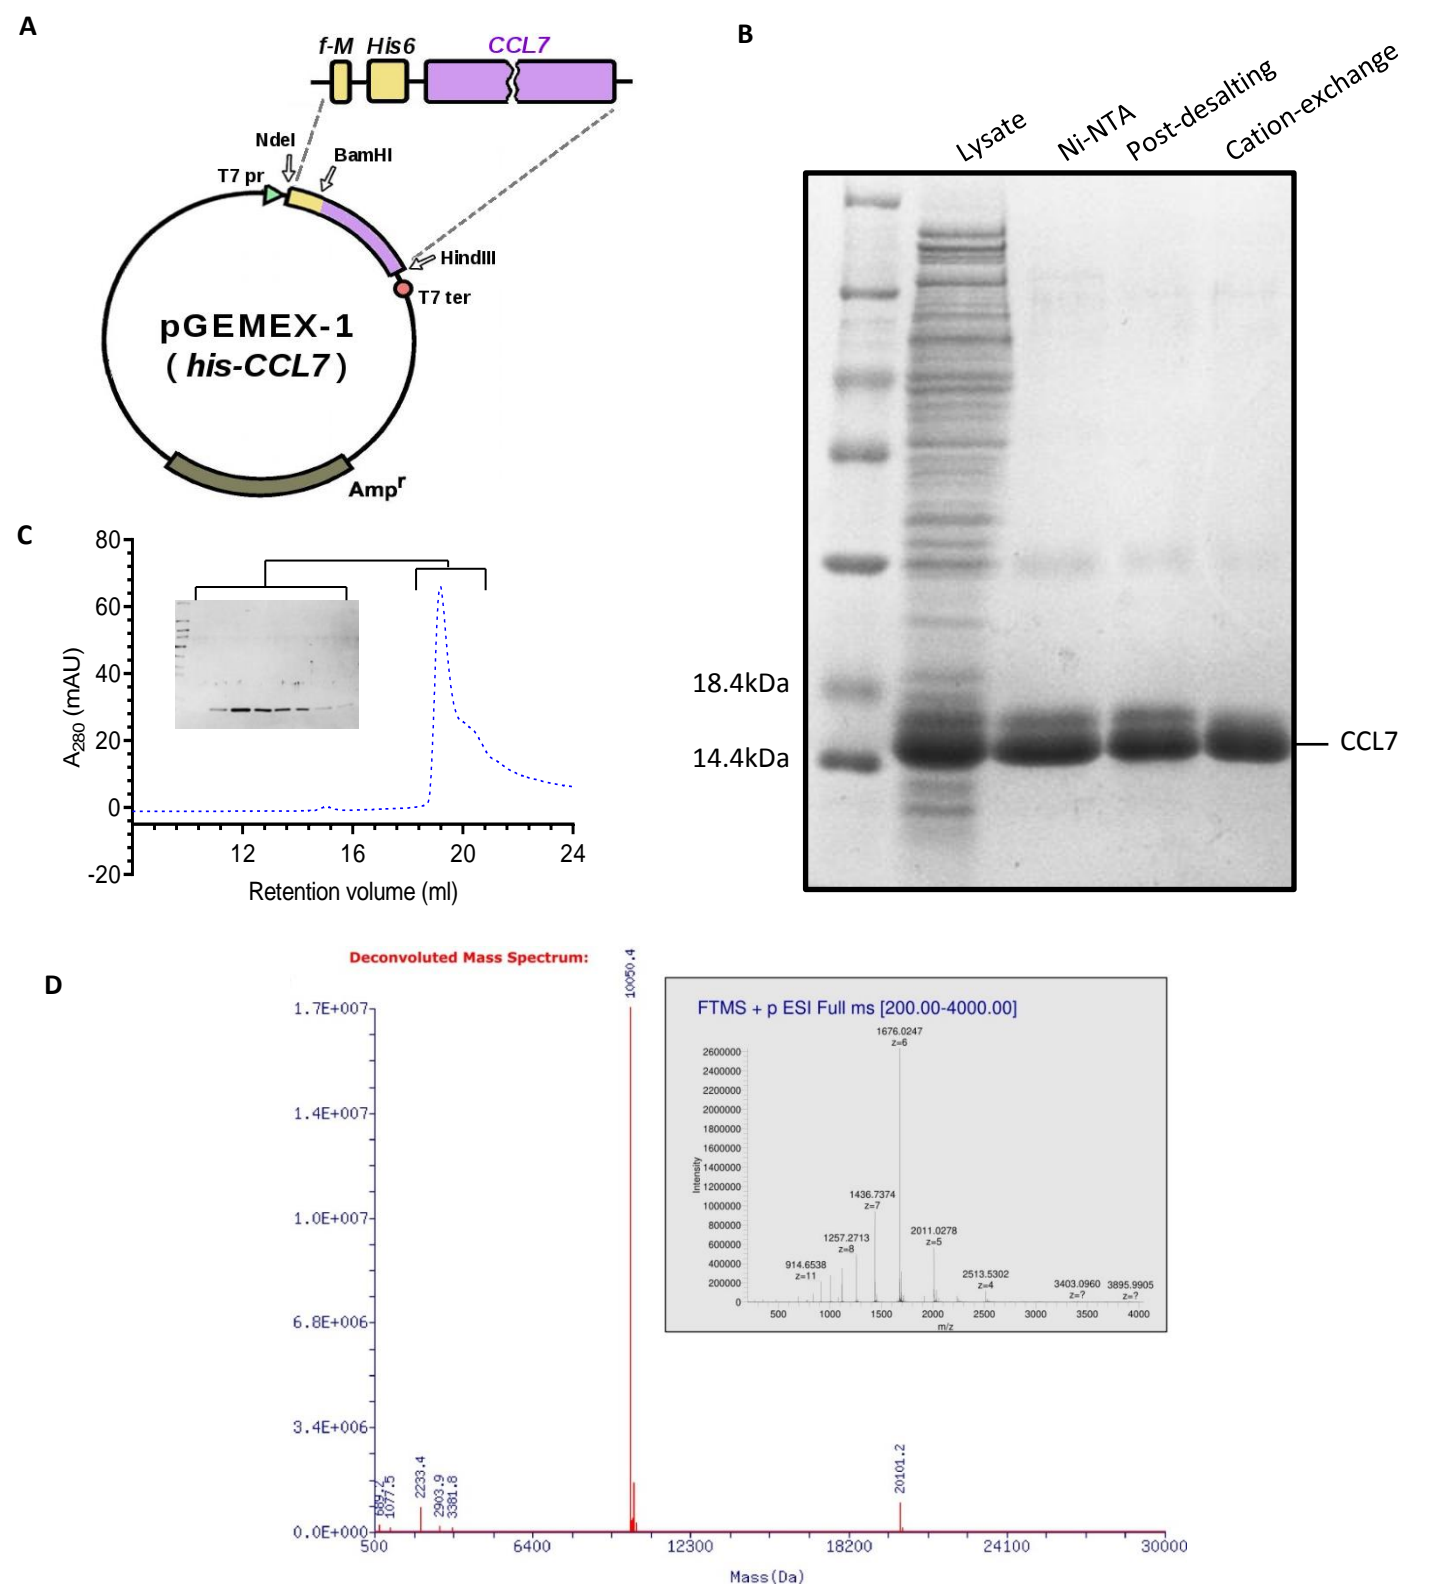

**Figure 1: Expression and purification of his-CCL7 from *E. coli*.** **A.** pGEMEX-1 derived expression vector for recombinant production of N-terminal His-tagged CCL7. The natural signal sequence of CCL7 was removed during cloning of CCL7 and a his6-tag was engineered at the N-terminus of CCL7. **B.** Purification of CCL7 using Ni-NTA, desalting and cation exchange chromatography. Samples from every step were loaded and separated using 16% Tris-Glycine SDS-PAGE followed by Coomassie staining for visualization. **C.** Size exclusion chromatography of CCL7 on Superdex 200 column revealed a monodisperse peak with an elution volume of 20mL. The inset shows the corresponding fractions analyzed by SDS-PAGE and Coomassie staining. **D.** Deconvoluted mass spectrum of his-CCL7 displays predominant m/z 10050.4 Da and confirms formation of two disulphide bonds. Inset: raw mass spectrum of his-CCL7 acquired on Thermo Scientific LTQ Orbitrap, electrospray ionization in positive mode.

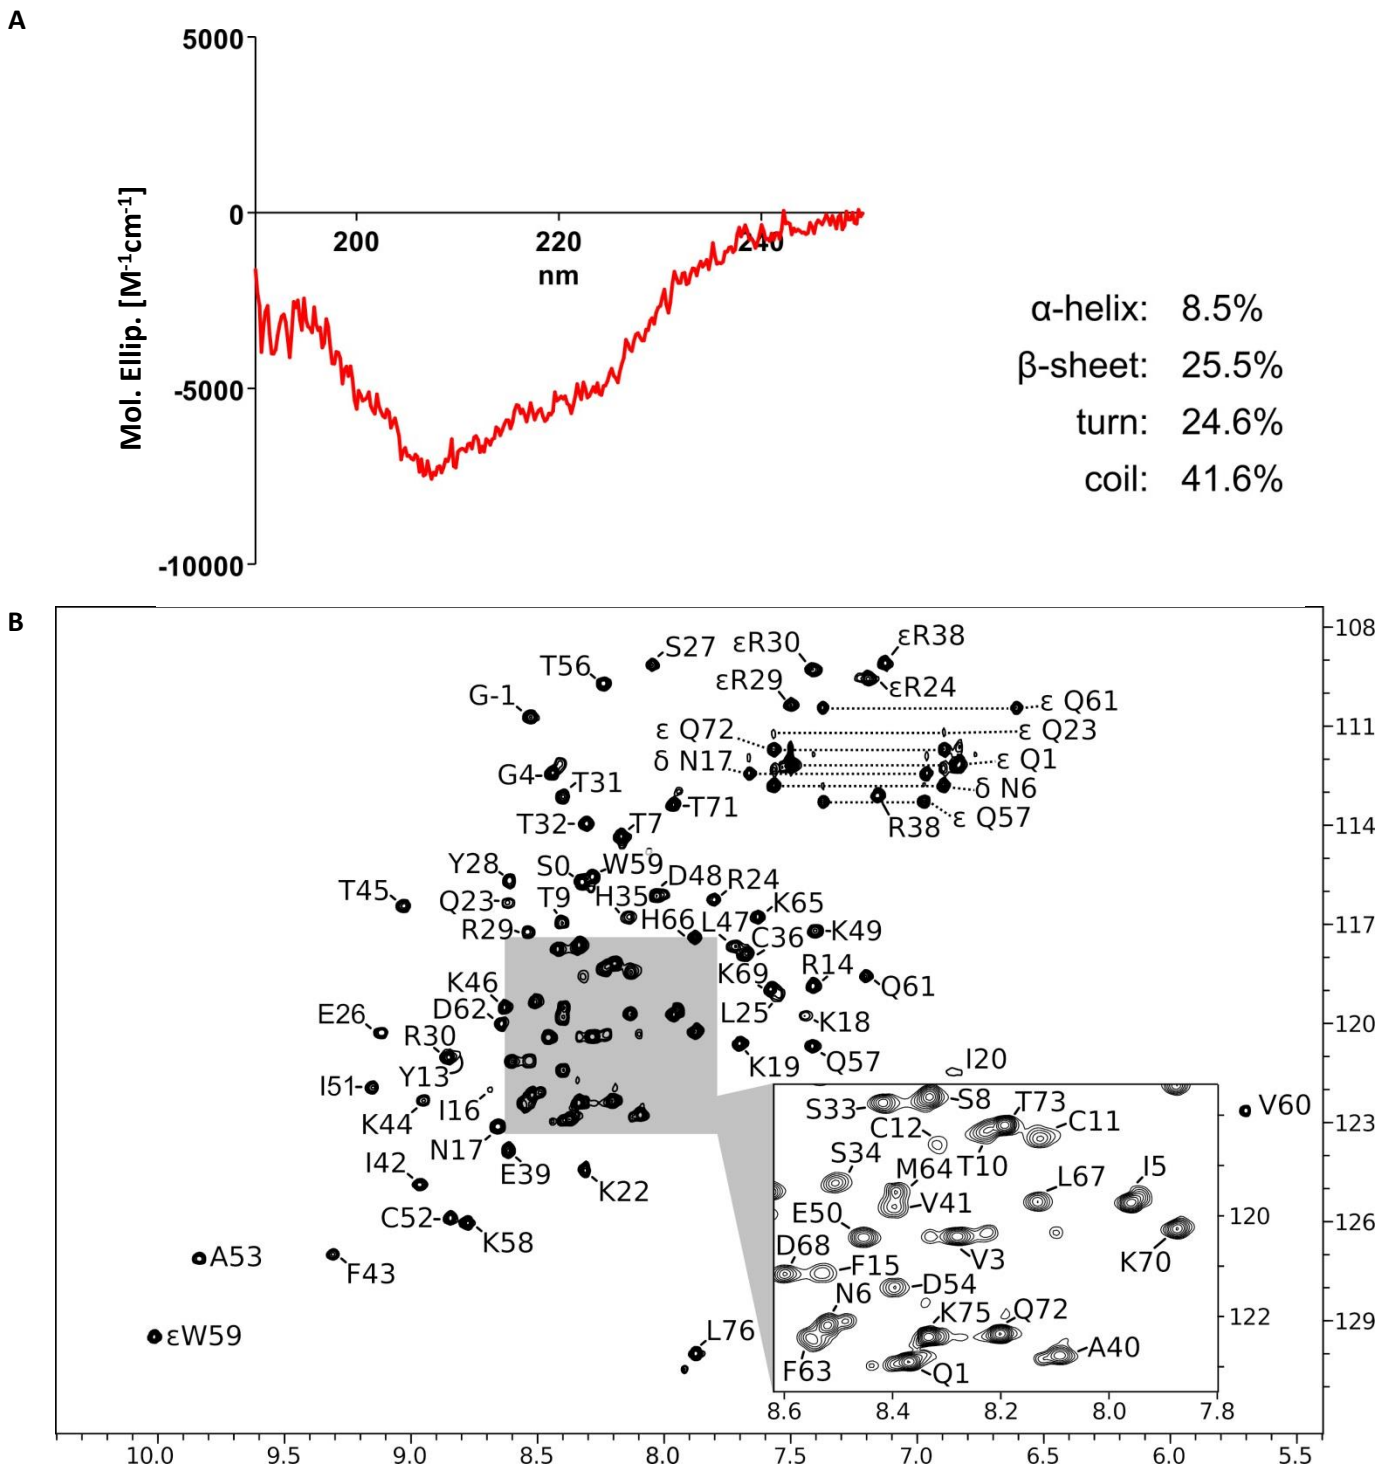

**Figure 2: Structural characterization of his-CCL7 by CD spectroscopy and NMR. A.** Circular dichroism (CD) spectrum of his-CCL7 acquired on J-810 spectropolarimeter (JASCO, Japan) at pH 5.8. The percentage of secondary structure elements were calculated in CONTINLL software (CDPro package) using SMP56 reference spectra. **B.**  $^1H$ - $^{15}N$  HSQC NMR spectrum of  $^{15}N$ -labeled his-CCL7. Backbone NH groups are denoted by one-letter amino acid notation followed by the residue number. NMR signals of N-terminal his6-tag are not observed. Non-natural N-terminal GS-linker residues are denoted as G-1 and S0 and together with the visible NH group of Q1 that three signals constitute all differences with natural CCL7 in  $^1H$ - $^{15}N$  HSQC as described earlier in (Kim et.al. 1996). The NMR signals of side-chain amines are prefixed by greek letters, two related resonances of  $NH_2$  groups (N, Q) are linked by dotted lines. Signals of  $\epsilon R$  are folded in  $^{15}N$  dimension (real  $^{15}N$  chemical shift  $\sim 85$  ppm). Central part of the spectrum is expanded for clarity. Chemical shifts of  $^1H$  and  $^{15}N$  are in ppm referenced to water resonance (4.7ppm). Conditions: Bruker Avance 700 MHz, 320  $\mu L$  of 0.8 mM of His-CCL7 in  $H_2O:D_2O$  (9:1) pH 5.1, shigemi tube, temperature 30°C.

**A**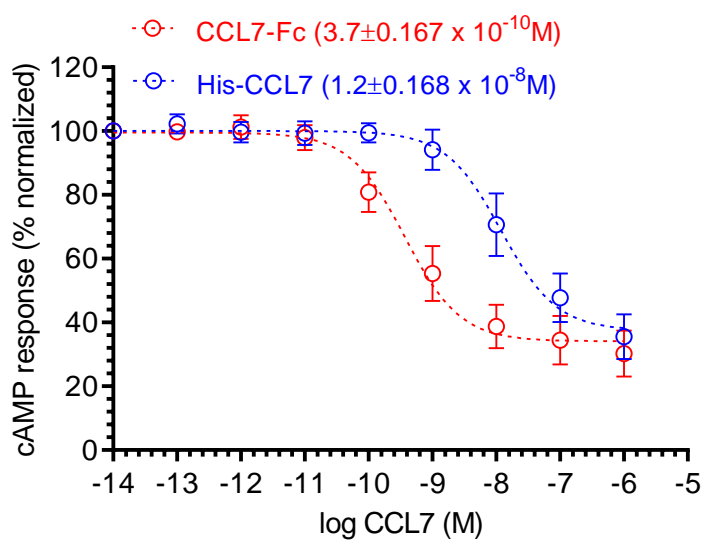**B**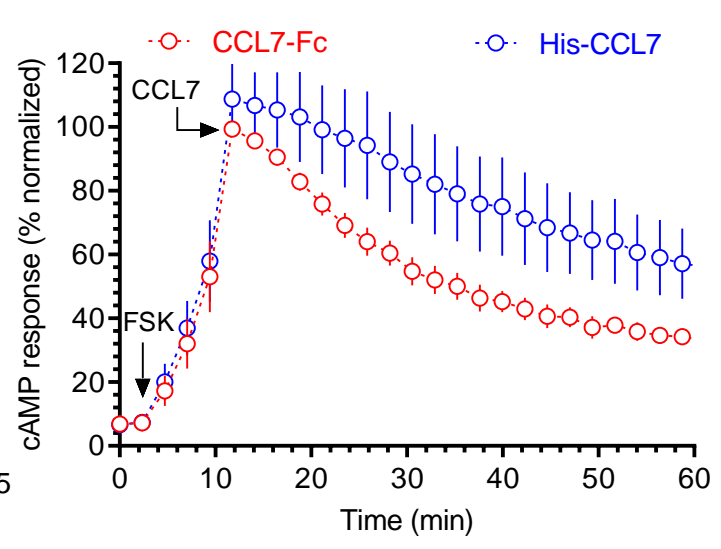

**Figure 3: Functional characterization of his-CCL7 in GloSensor based G-protein coupling assay. (A)** The ability of different CCL7 preparations to inhibit Forskolin-induced cAMP response downstream of human chemokine receptor CCR2 in transfected HEK-293 cells. The his-CCL7 represents N-terminal His6-tagged version while CCL7-Fc represents a C-terminal Fc-tagged version of CCL7 expressed and purified from *Sf9* cells. Data represent average  $\pm$  SEM of four independent experiments carried out in duplicates and normalized with respect to lowest concentration of CCL7-Fc (treated as 100%). **(B)** Time-course analysis of CCL7 induced decrease in the cAMP level over the indicated time-period. Values recorded in the GloSensor assay at a concentration of 10nM from the experiments presented in panel A are plotted. The arrow indicates the time of CCL7 addition and the values are normalized with maximal cAMP response observed for CCL7-Fc (treated as 100%).

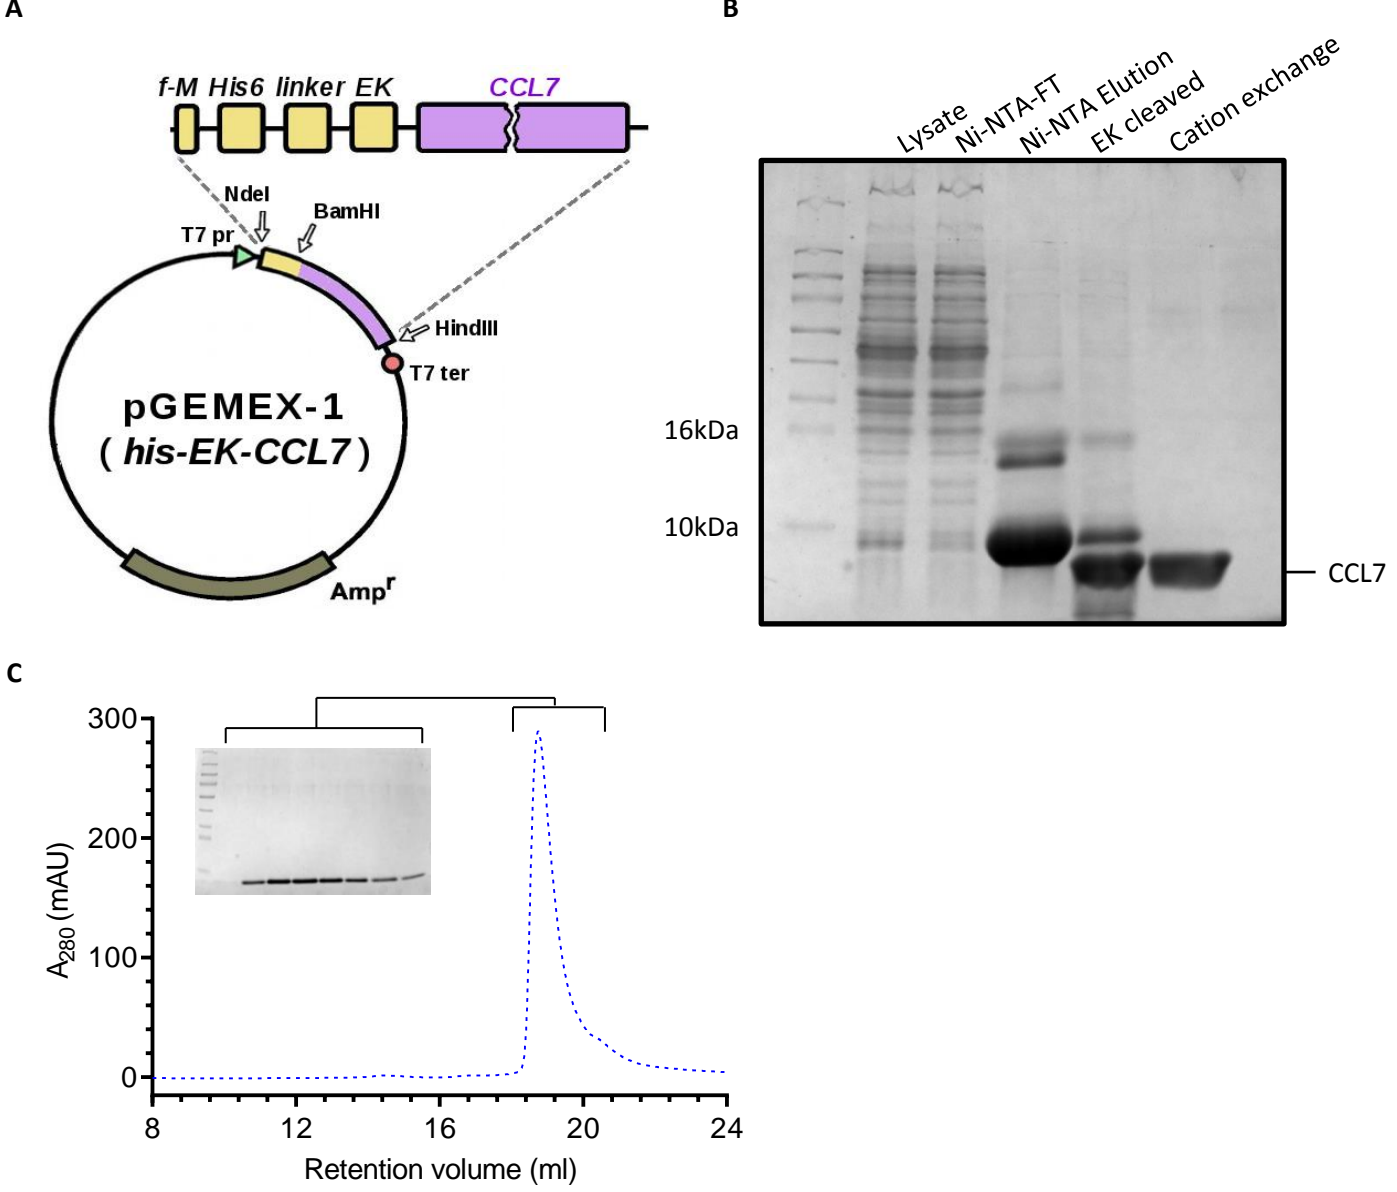

**Figure 4: Expression and purification of native CCL7 from *E. coli*.** **A.** pGEMEX-1 derived expression construct for recombinant production of native CCL7. The natural signal sequence of CCL7 was removed during cloning of CCL7 and an N-terminal His6 tagged followed by enterokinase (EK) cleavage site (DDDDR) were engineered. A five amino acid long linker (GSGSG) was also included between the his-tag and EK site. **B.** Purification of CCL7 using Ni-NTA, enterokinase digestion, and cation exchange chromatography yielded purified protein. Samples from every step were loaded and separated using SDS-PAGE followed by Coomassie staining for visualization. **C.** Size exclusion chromatography of CCL7 on Superdex 200 column revealed a monodisperse peak with an elution volume of 20mL. The inset show the corresponding fractions analyzed by SDS-PAGE and Coomassie staining.

A

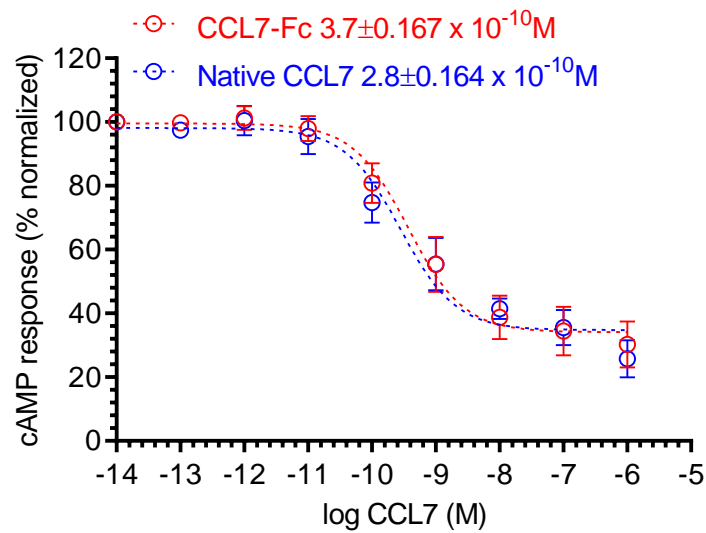

B

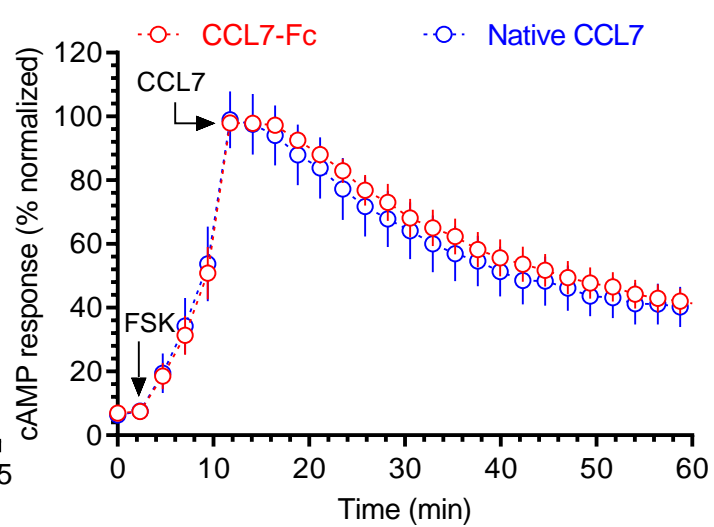

**Figure 5: Functional characterization of native CCL7 in GloSensor based G-protein coupling assay. (A)** The ability of different CCL7 preparations to inhibit Forskolin-induced cAMP response downstream of human chemokine receptor CCR2 in transfected HEK-293 cells. Native CCL7 represents untagged version while CCL7-Fc represents a C-terminal Fc-tagged version of CCL7 expressed and purified from *Sf9* cells. Data represent average  $\pm$  SEM of four independent experiments carried out in duplicates and normalized with respect to lowest concentration of CCL7-Fc (treated as 100%). (B) Time-course analysis of CCL7 induced decrease in the cAMP level over the indicated time-period. Values recorded in the GloSensor assay at a concentration of 1nM from the experiments presented in panel A are plotted. The arrow indicates the time of CCL7 addition and the values are normalized with maximal cAMP response observed for CCL7-Fc (treated as 100%).

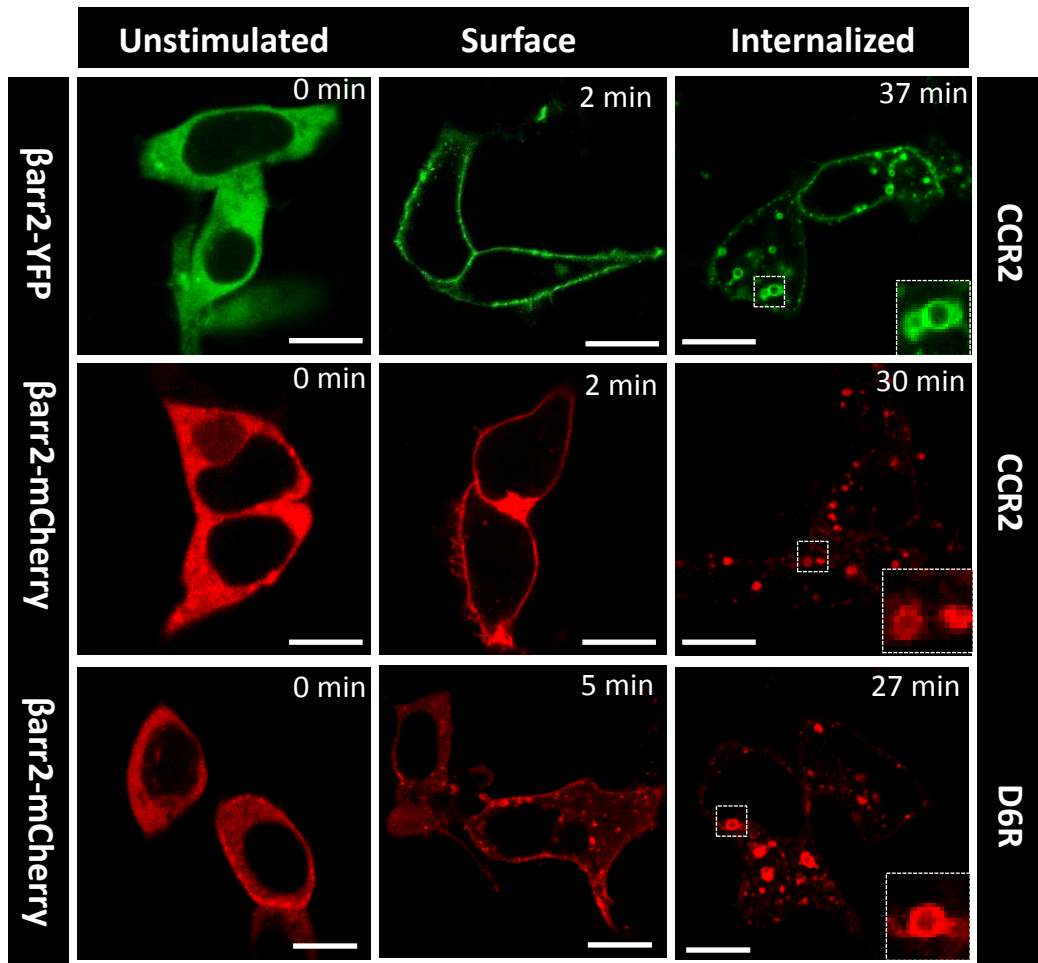

**Figure 6: Functional characterization of CCL7 as assessed by agonist-induced trafficking of  $\beta$ -arrestin 2.** HEK-293 cells expressing either CCR2 or D6R (ACKR2) together with  $\beta$ -arrestin 2-YFP or  $\beta$ -arrestin 2-mCherry were stimulated with saturating concentration of native CCL7 ( $1\mu\text{M}$ ) for indicated time-points. Subsequently, the trafficking of  $\beta$ -arrestin 2 was monitored using confocal microscopy. Representative images from two independent experiments are shown and the scale bar is  $10\mu\text{m}$ .
